# Supplementary material for: Expression and drought functional analysis of one circRNA PecircCDPK from moso bamboo (Phyllostachys edulis)
Source: PeerJ. 2024 Sep 30;12:e18024. doi: 10.7717/peerj.18024 (PMC11448651; doi:10.7717/peerj.18024)
Supplement: Supplemental Information 1 [file peerj-12-18024-s001.xlsx]

## Sheet: The primers used in this study
Table S1. The primers used in this study
Primer Name	Primers (5'-3')		Usage
	Forward	Reverse
Intron fragment of moso bamboo PH02Gene31251 gene	CTCATCACCAAGGAGGACGTC	CTCAGCAGTCGGCAAAGCGA	PCR
PecircCDPK loop-forming regions with flanking intron fragments	GGTACCTTCCCATGTAGAACTTCCTTG	TGTACACATGTGCAAGAAACCAGTTG	PCR
Using divergent primer to identify transgenic Arabidopsis thaliana	TTCAAGGCAATGGACACAGA	AGGAGCAACTCCATGGTCAC	PCR
AtCDPK13	TCCATTGAGGAGTTGAAAGCCGGA	GCTTTGCGGAGATGCTCATCGTTT	qRT-PCR
AtACTIN	GGTGTCATGGTTGGTATGGGTC	CCTCTGTGAGTAGAACTG	qRT-PCR

## Sheet: PerircCDPK  sequence
gtcatccgtggatttgtgaccatggagttgctcctgatcggcctcttgatccagctgtcctttctcgcattaagcagttctcagcaatgaataagttgaagaagatggctttgcgagtaattgctgagagcctttcagaggaggagattgcaggactaaaggaaatgttcaaggcaatggacacagataacagcggtgcaattacatatgatgagctcaaagaaggcatgagaaaatatggttcaacactaaaggatacagaaattcgtgatcttatggaggcg
