# Supplementary material for: Expression and drought functional analysis of one circRNA PecircCDPK from moso bamboo (Phyllostachys edulis)
Source: PeerJ. 2024 Sep 30;12:e18024. doi: 10.7717/peerj.18024 (PMC11448651; doi:10.7717/peerj.18024)
Supplement: Supplemental Information 2 [file peerj-12-18024-s002.xlsx]

## Sheet: Figure 1.
	Relative expression of PecircCDPK under the drought stress
		VAR00002
	sample	average	Standard Deviation	Repetitions	Statistical significance
	P1	1	0	3
	P2	0.46775	0.331562	3	∗∗
	P3	0.0269667	0.0165742	3	∗∗
	P4	0.0302667	0.0403859	3	∗∗
	P5	0.1356	0.202425	3	∗∗

## Sheet: Figure 2.
Expression profile of the AtCDPK13 gene in transgenic Arabidopsis thaliana.
sample	average	Standard Deviation	Repetitions	Statistical significance
WT	1.11	0	3
OE-1	1.33333	0.0677	3	*
OE-2	1.38	0.0896	3	*
OE-3	1.20333	0.0259	3

## Sheet: Figure 4.
Comparison of changes in relative water content in leaves of PecircCDPK transgenic Arabidopsis thaliana.										Comparison of changes in water loss rate in leaves of PecircCDPK transgenic Arabidopsis thaliana.
sample	average	Standard Deviation	Repetitions	Statistical significance						min	OE	WT
OE-1	0.6	0.0509997	3	*						0	0	0
OE-2	0.58	0.0505997	3	*						10	0.0444535	0.0850734
OE-3	0.645866	0.0505997	3	*						20	0.0692893	0.115738
WT	0.465768	0.0856835	3							30	0.15736	0.210025
										40	0.186932	0.23875
										50	0.201504	0.255602
										60	0.201509	0.252889
										90	0.259449	0.317482
										120	0.274011	0.323806
										150	0.309627	0.357319
										180	0.347337	0.380433
										210	0.365797	0.422395
										240	0.413307	0.448024
										300	0.486046	0.508385
										360	0.527564	0.546008
										420	0.634744	0.636189
										480	0.672993	0.671737
										final	1	1

## Sheet: Figure 5.
POD activity/( U/g FW）						MDA/(μg/g FW）						Free proline content/(μg/g FW）						SOD activity/( U/g FW）
	WT	OE-1	OE-2				WT	OE-1	OE-2				WT	OE-1	OE-2				WT	OE-1	OE-2
CK	23.21	25.47	26.46			CK	4.76	4.89	4.46			CK	120.5	126	128			CK	54.31	56.49	58.47
	22.18	24.13	24.13				4.33	4.45	4.31				140.1	145	151				51.28	52.35	55.64
	26.59	26.78	25.74				4.58	4.61	4.68				135	119	132				57.56	59.13	57.15
Drought	50.89	70.86	75.56			Drought	13.86	10.56	9.59			Drought	1368	2145	2431			Drought	120.89	210.58	230.46
	54.36	73.42	78.43				12.24	11.12	10.23				1432	2314	2286				140.7	220.36	215.8
	57.46	68.18	72.94				11.45	9.35	10.21				1391	2246	2342				134.8	202.12	222.9
